# Supplementary material for: Roscovitine effectively enhances antitumor activity of temozolomide in vitro and in vivo mediated by increased autophagy and Caspase-3 dependent apoptosis
Source: PubMed Central journal article supplement (PMC6428853; doi:10.1038/s41598-019-41380-1), 2019-03-21
Supplement: 41598_2019_41380_MOESM1_ESM.pdf [file 41598_2019_41380_MOESM1_ESM.pdf]

Roscovitin effectively enhances antitumor activity of temozolomide in vitro and in vivo mediated by increased autophagy and Caspase-3 dependent apoptosis.

Vimal Pandey\*, Nikhil Ranjan\*, Parimala Narne, Prakash Babu Phanithi#

Laboratory of Neuroscience, Department of Biotechnology & Bioinformatics, School of Life Sciences, University of Hyderabad, Hyderabad, AP, India

# Corresponding Author

Phone: 0091-40-23134584; 23013336; Fax: 0091-40-23010120

Email: [prakash@uohyd.ac.in](mailto:prakash@uohyd.ac.in); [prakashbabuphanithi@gmail.com](mailto:prakashbabuphanithi@gmail.com)

\*Equal contribution

Running title: Roscovitin enhances temozolomide chemo-sensitivity in glioma

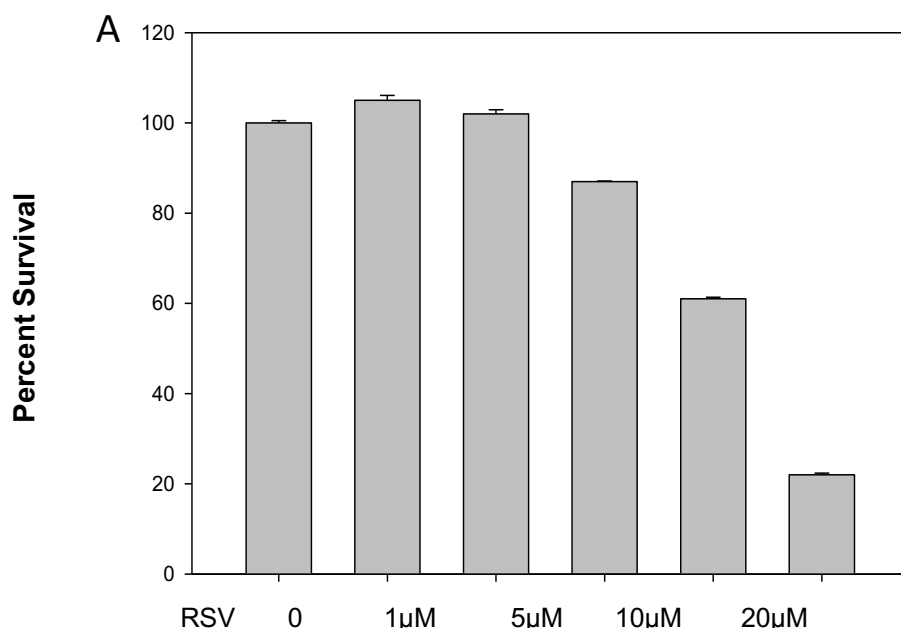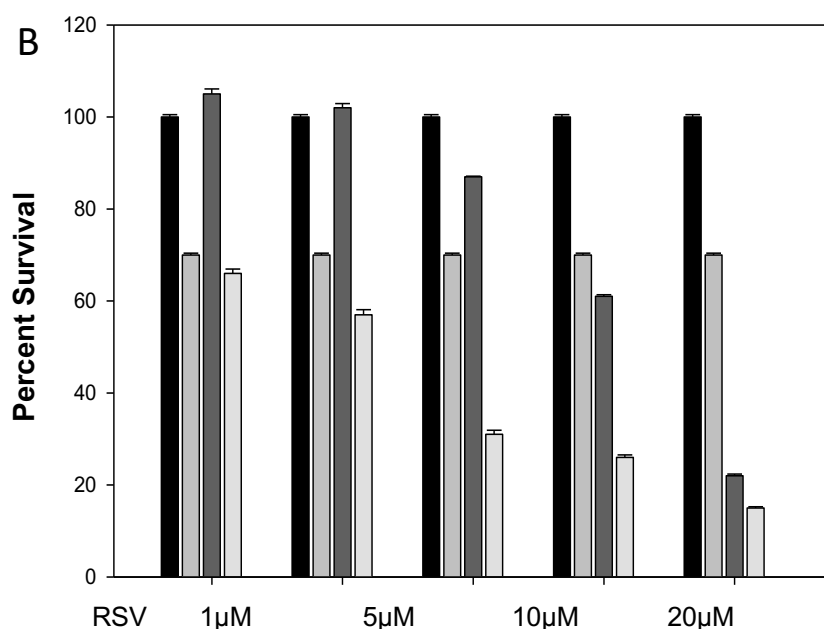

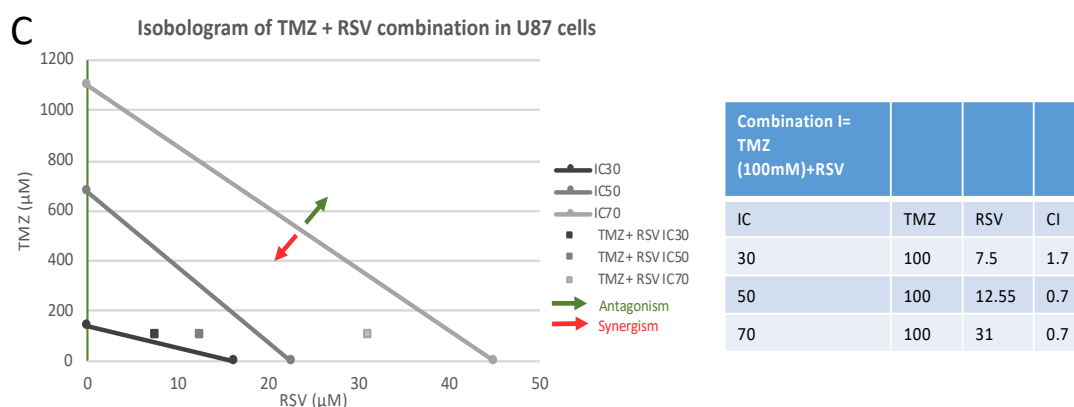

**Supplementary Figure 1: Roscovitine reduces glioma cell viability and potentiates the cytotoxic effects of TMZ on glioma cells.** A) Effect of RSV on cell viability in LN 18 human glioma cell lines. The cells were treated with increasing concentrations of RSV for 72 h and cell viability was assessed by MTT assay. B) Effect of TMZ and RSV co treatment on cell viability of LN18 glioma cell lines. Cells were treated first with indicated concentrations of RSV followed by co-treatment with 100 µM TMZ. After 72h incubation with the drugs cell viability was measured by MTT assay. C) Isobologram and combination index (CI) of TMZ and RSV in U87 cells. The CI was calculated using the formula:

$$CI = \frac{C_{A,X}}{IC_{X,A}} + \frac{C_{B,X}}{IC_{X,B}}$$

where  $C_{A,X}$  and  $C_{B,X}$  are the concentration of TMZ(A) and RSV(B) used in combination to achieve x % drug effect.  $IC_{X,A}$  and  $IC_{X,B}$  are the concentrations for single agents to achieve the same effect. A CI of less than, equal to, or more than 1 indicates synergic, additive or antagonistic effect, respectively.

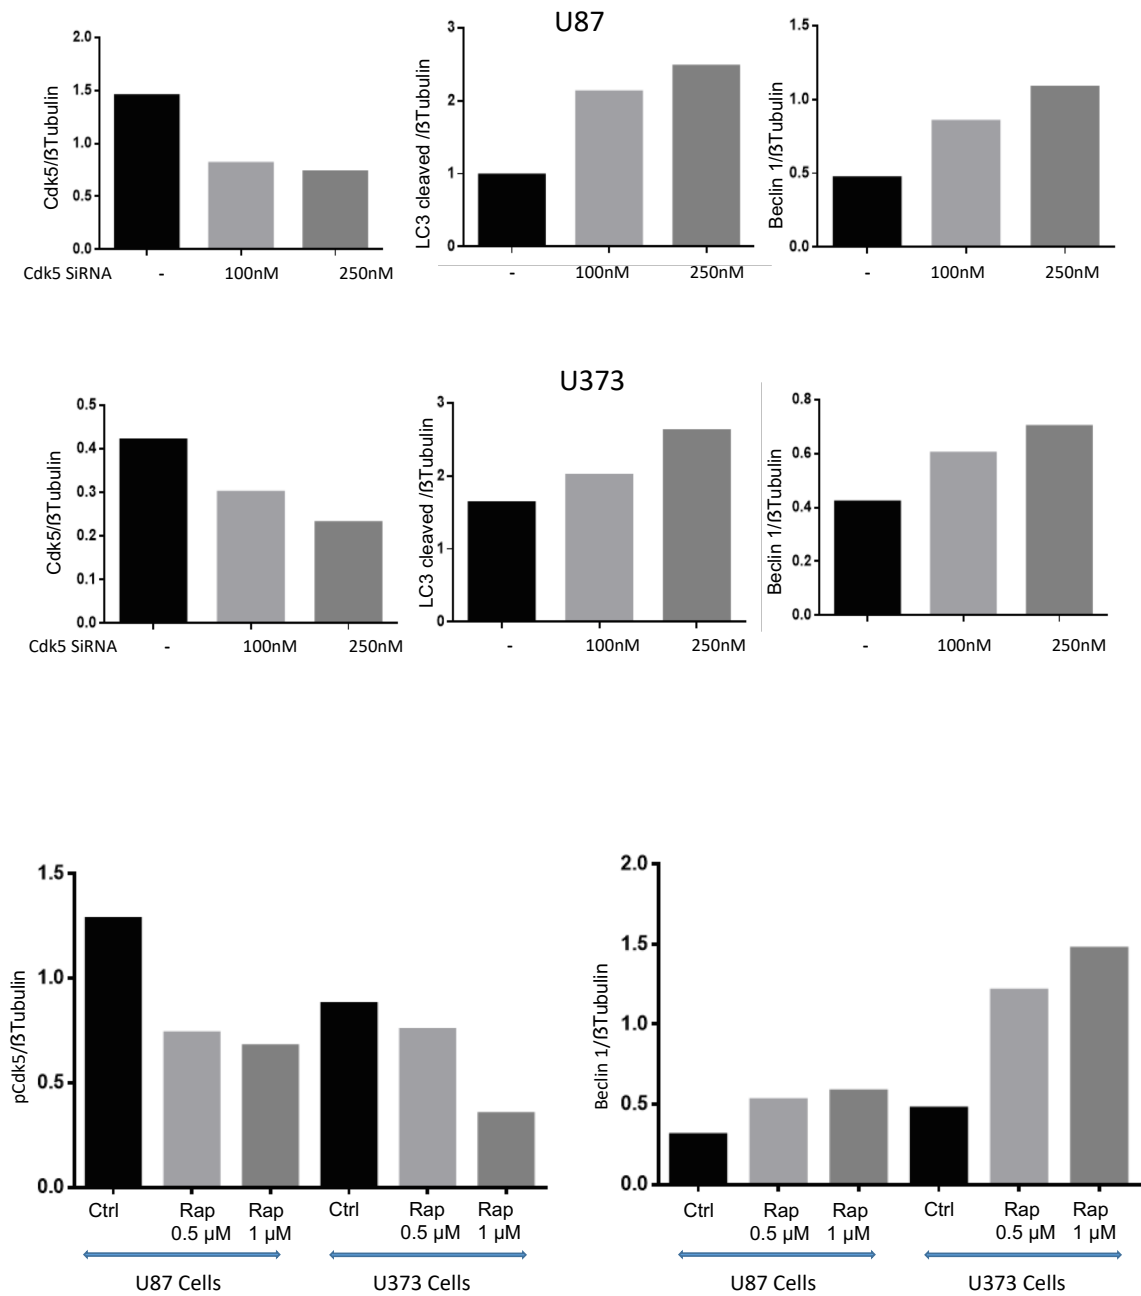

**Supplementary Figure 2 :** Densitometric analysis of immunoblots from Figure 4. The intensities of individual protein bands were quantified using ImageJ software, were normalized to the intensities of their respective loading controls and were then plotted as histograms.



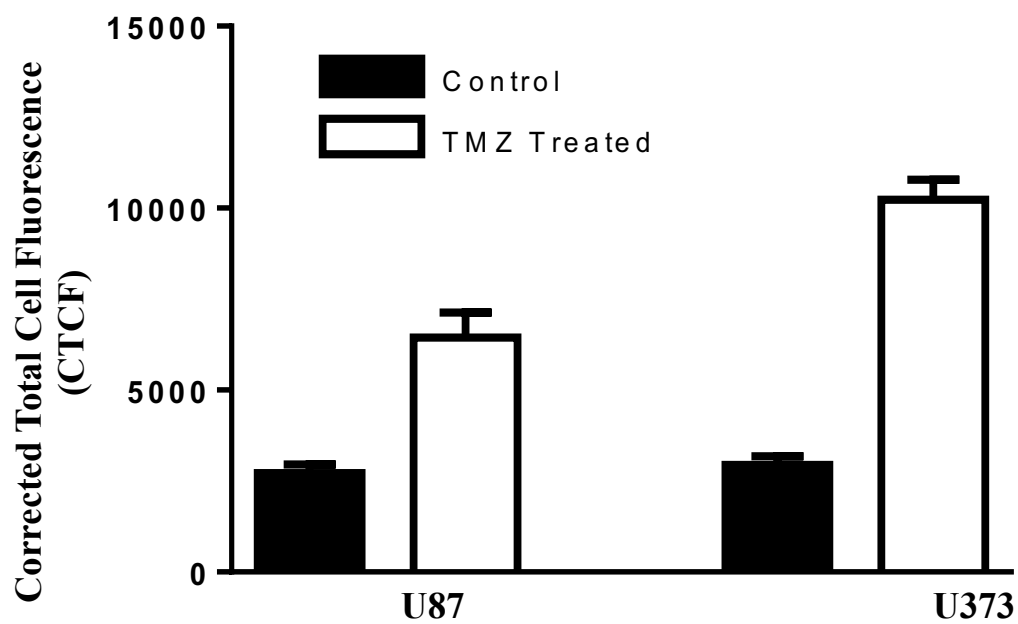

**Supplementary Figure 3:** Immuno-fluorescent staining quantification data for LC3B in U87 and U373 untreated and TMZ treated cells. (Fig. 6)

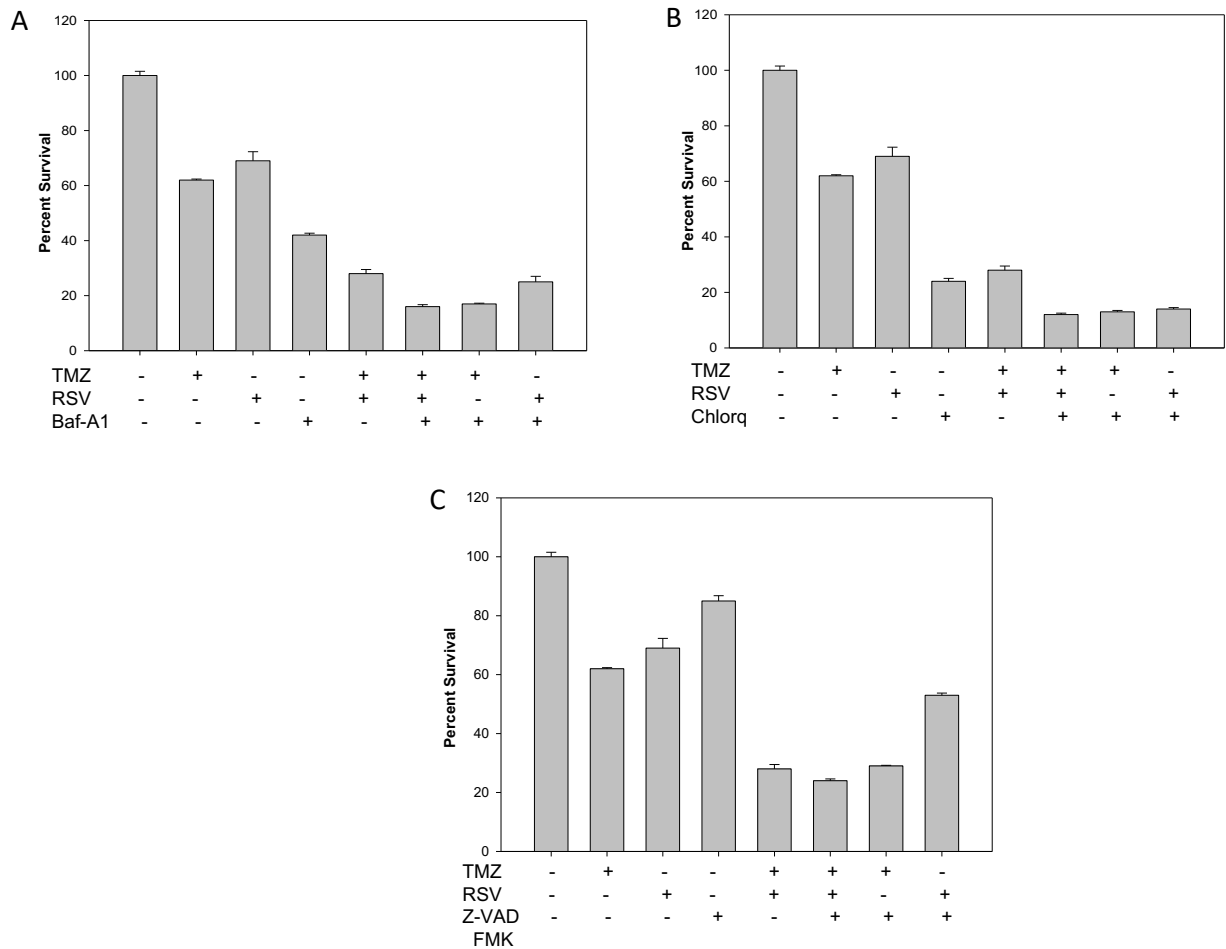

**Supplementary Figure 4:** Effect of A) Bafilomycin , (B) Chloroquine, autophagy inhibitors and (C) Z-VAD FMK, a pan caspase inhibitor on the cytotoxicity of various drug treatments in C6 cells. For this assay, C6 cells were pretreated with indicated concentrations of inhibitors for 2 h and then treated with TMZ, RSV or TMZ+RSV for 72h. This was followed MTT assay to determine percent cell survival.

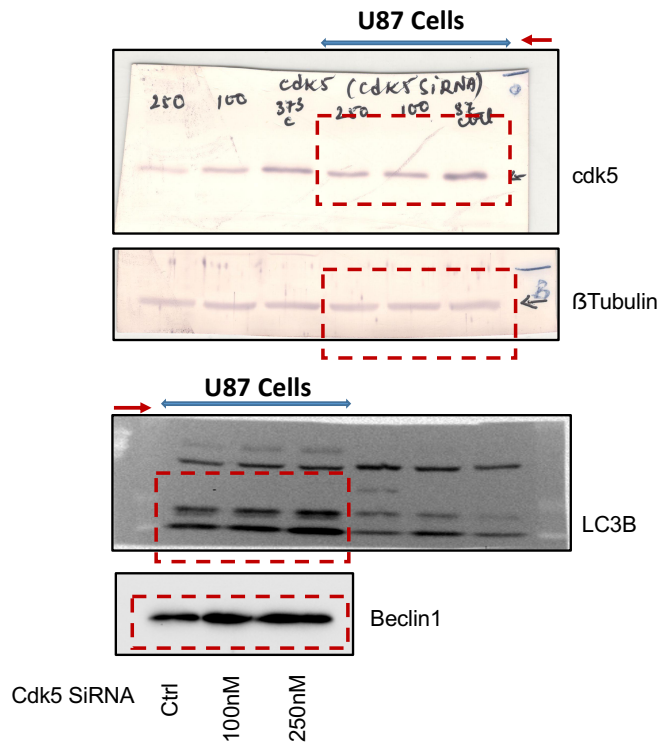

**Supplementary Figure 5: Full Length blots of Cdk5,  $\beta$  tubulin, LC3B and Beclin 1 (Fig. 4, U87 cells)**

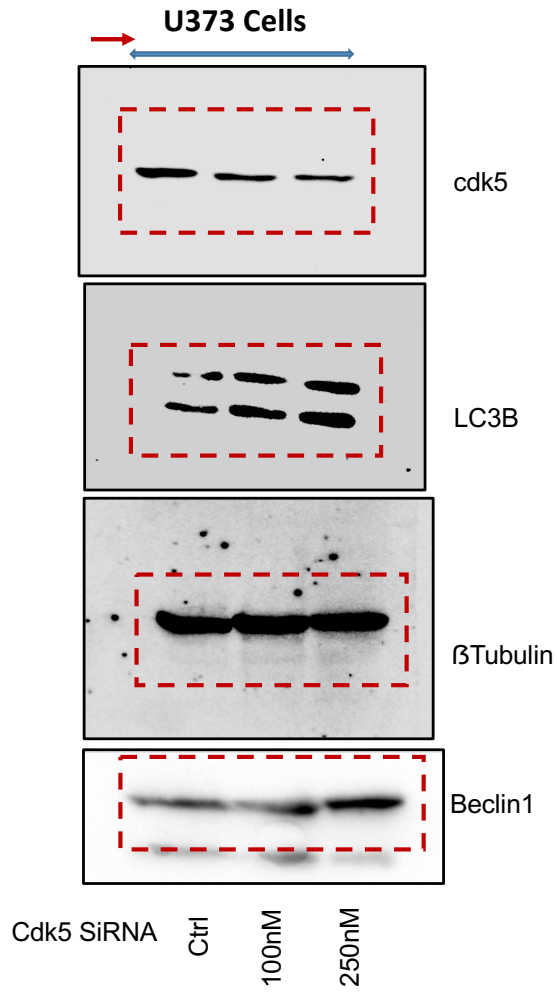

**Supplementary Figure 6: Full Length blots of pCdk5,  $\beta$  tubulin and LC3B (Fig. 4, U373 cells)**

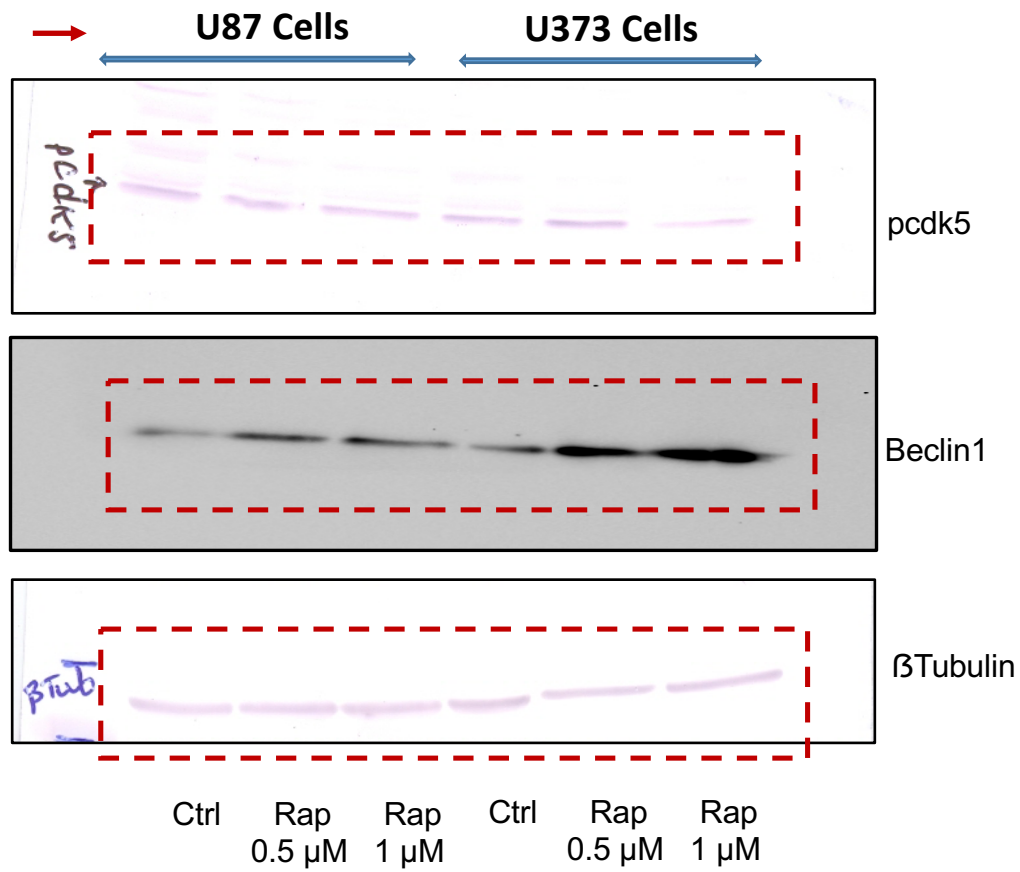

Supplementary Figure 7: Full Length blots of pCdk5, Beclin 1 and  $\beta$  tubulin (Fig. 4)

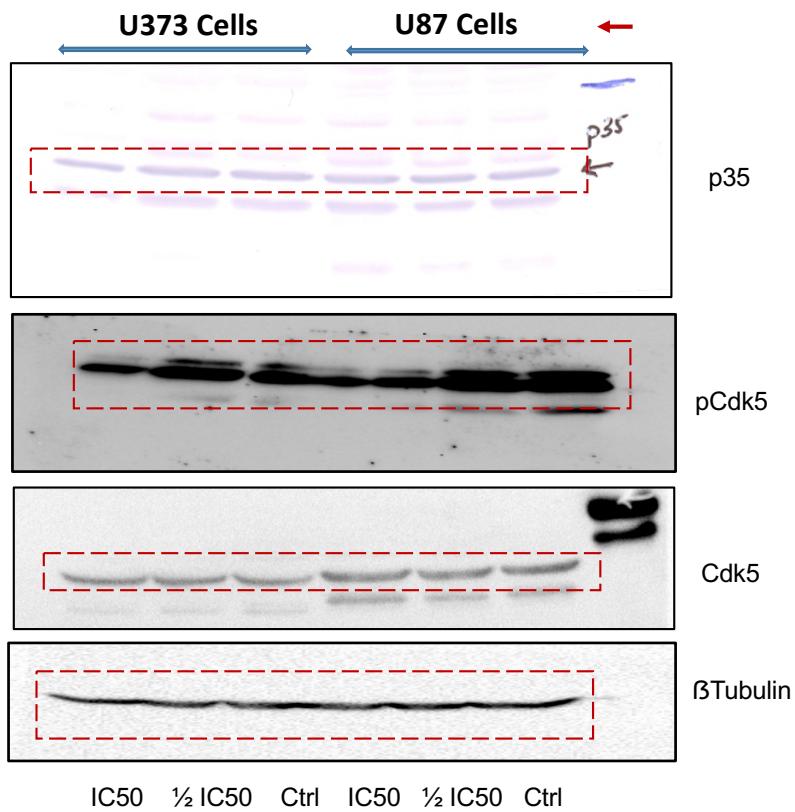

**Supplementary Figure 8: Full Length blots of p35, pCdk5, Cdk5 and β tubulin (Fig. 5)**

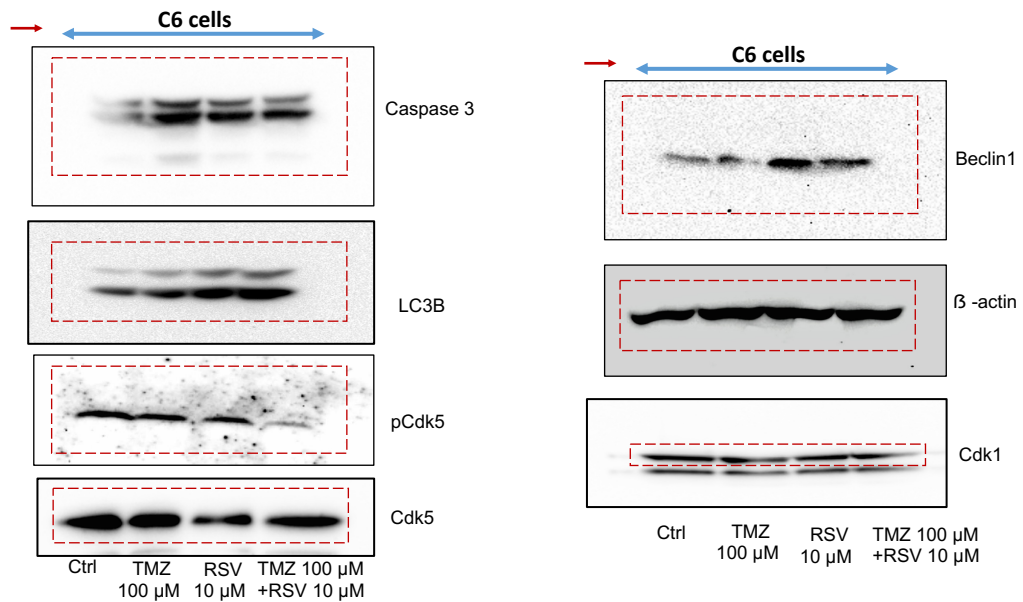

**Supplementary Figure 9: Full Length blots of Caspase 3, LC3B, pCdk5, Beclin1 and β tubulin (Fig. 5)**

## IHC Quantification Data (IHC profiler Plugin, Image J software)

### Supplementary Table 1: Ki67

|         | High Positive  | Positive       | Low Positive    | Negative      | Staining Result |
|---------|----------------|----------------|-----------------|---------------|-----------------|
| Ctrl    | 52.41 ± 2.596  | 45.72 ± 3.330  | 1.867 ± 0.7337  | 0.0 ± 0.0     | High Positive   |
| TMZ     | 11.57 ± 1.367  | 25.40 ± 4.360  | 33.95 ± 4.375   | 24.09 ± 2.369 | Positive        |
| RSV     | 2.217 ± 0.8296 | 12.48 ± 2.127  | 44.70 ± 4.934   | 40.61 ± 1.977 | Low Positive    |
| TMZ+RSV | 2.664 ± 1.570  | 7.150 ± 0.8564 | 17.63 ± 0.04875 | 72.56 ± 2.476 | Negative        |

### Supplementary Table 2: GFAP

|         | High Positive         | Positive         | Low Positive   | Negative       | Staining Result |
|---------|-----------------------|------------------|----------------|----------------|-----------------|
| Control | 50.89 ± 3.949         | 35.58 ± 3.198    | 10.73 ± 0.3554 | 2.805 ± 0.3957 | High Positive   |
| TMZ     | 4.796 ± 0.1391        | 8.057 ± 1.546    | 29.73 ± 4.665  | 57.42 ± 6.350  | Low Positive    |
| RSV     | 1.514 ± 0.6465        | 8.156 ± 1.869    | 34.96 ± 4.570  | 55.37 ± 3.348  | Low Positive    |
| TMZ+RSV | 0.0001788 ± 0.0001358 | 0.8645 ± 0.05705 | 13.80 ± 0.3909 | 85.34 ± 0.4478 | Negative        |

**Supplementary Table 3: CD31**

|         | High Positive       | Positive       | Low Positive  | Negative       | Staining Result |
|---------|---------------------|----------------|---------------|----------------|-----------------|
| Ctrl    | 16.07 ± 1.061       | 34.86 ± 6.889  | 38.20 ± 7.599 | 10.87 ± 0.3510 | Positive        |
| TMZ     | 0.07045 ± 0.02108   | 5.377 ± 0.9341 | 37.01 ± 2.751 | 57.54 ± 3.664  | Low Positive    |
| RSV     | 0.002605 ± 0.002489 | 1.100 ± 0.1347 | 30.17 ± 2.884 | 68.73 ± 3.021  | Low Positive    |
| TMZ+RSV | 3.743 ± 0.7390      | 8.541 ± 1.327  | 43.05 ± 6.636 | 44.67 ± 4.570  | Low Positive    |

**Supplementary Table 4: VEGF**

|      | High Positive  | Positive       | Low Positive  | Negative       | Staining Result |
|------|----------------|----------------|---------------|----------------|-----------------|
| Ctrl | 11.30 ± 0.8798 | 35.19 ± 0.9436 | 49.76 ± 1.171 | 3.738 ± 0.6522 | Positive        |
| TMZ  | 7.798 ± 1.298  | 26.41 ± 4.372  | 37.10 ± 1.784 | 28.69 ± 3.885  | Low Positive    |
| RSV  | 6.860 ± 2.471  | 24.44 ± 2.907  | 44.88 ± 4.356 | 23.83 ± 1.022  | Low Positive    |



|         |                   |                |                  |                  |              |
|---------|-------------------|----------------|------------------|------------------|--------------|
| TMZ+RSV | 1.867 ±<br>0.9182 | 10.02 ± 0.6541 | 49.37 ±<br>2.845 | 38.74 ±<br>1.273 | Low Positive |
|---------|-------------------|----------------|------------------|------------------|--------------|

**Supplementary Table 5: LC3B**

|         | High Positive    | Positive         | Low Positive      | Negative          | Staining Result |
|---------|------------------|------------------|-------------------|-------------------|-----------------|
| Ctrl    | 6.716 ±<br>2.642 | 10.19 ±<br>1.166 | 38.85 ±<br>3.688  | 44.25 ±<br>0.1209 | Low Positive    |
| TMZ     | 16.03 ±<br>2.629 | 16.58 ±<br>2.085 | 42.88 ±<br>0.4332 | 24.51 ±<br>0.1106 | Positive        |
| RSV     | 12.66 ±<br>1.415 | 31.29 ±<br>3.071 | 35.29 ±<br>1.704  | 20.77 ±<br>2.783  | Positive        |
| TMZ+RSV | 21.14 ±<br>2.994 | 36.04 ±<br>5.253 | 27.72 ±<br>3.495  | 15.10 ±<br>4.752  | High Positive   |
